# Supplementary material
Source: PubMed Central journal article supplement (PMC4933201)

**Supplementary figure 1.** Flow diagram of neonatal magnetic resonance imaging study

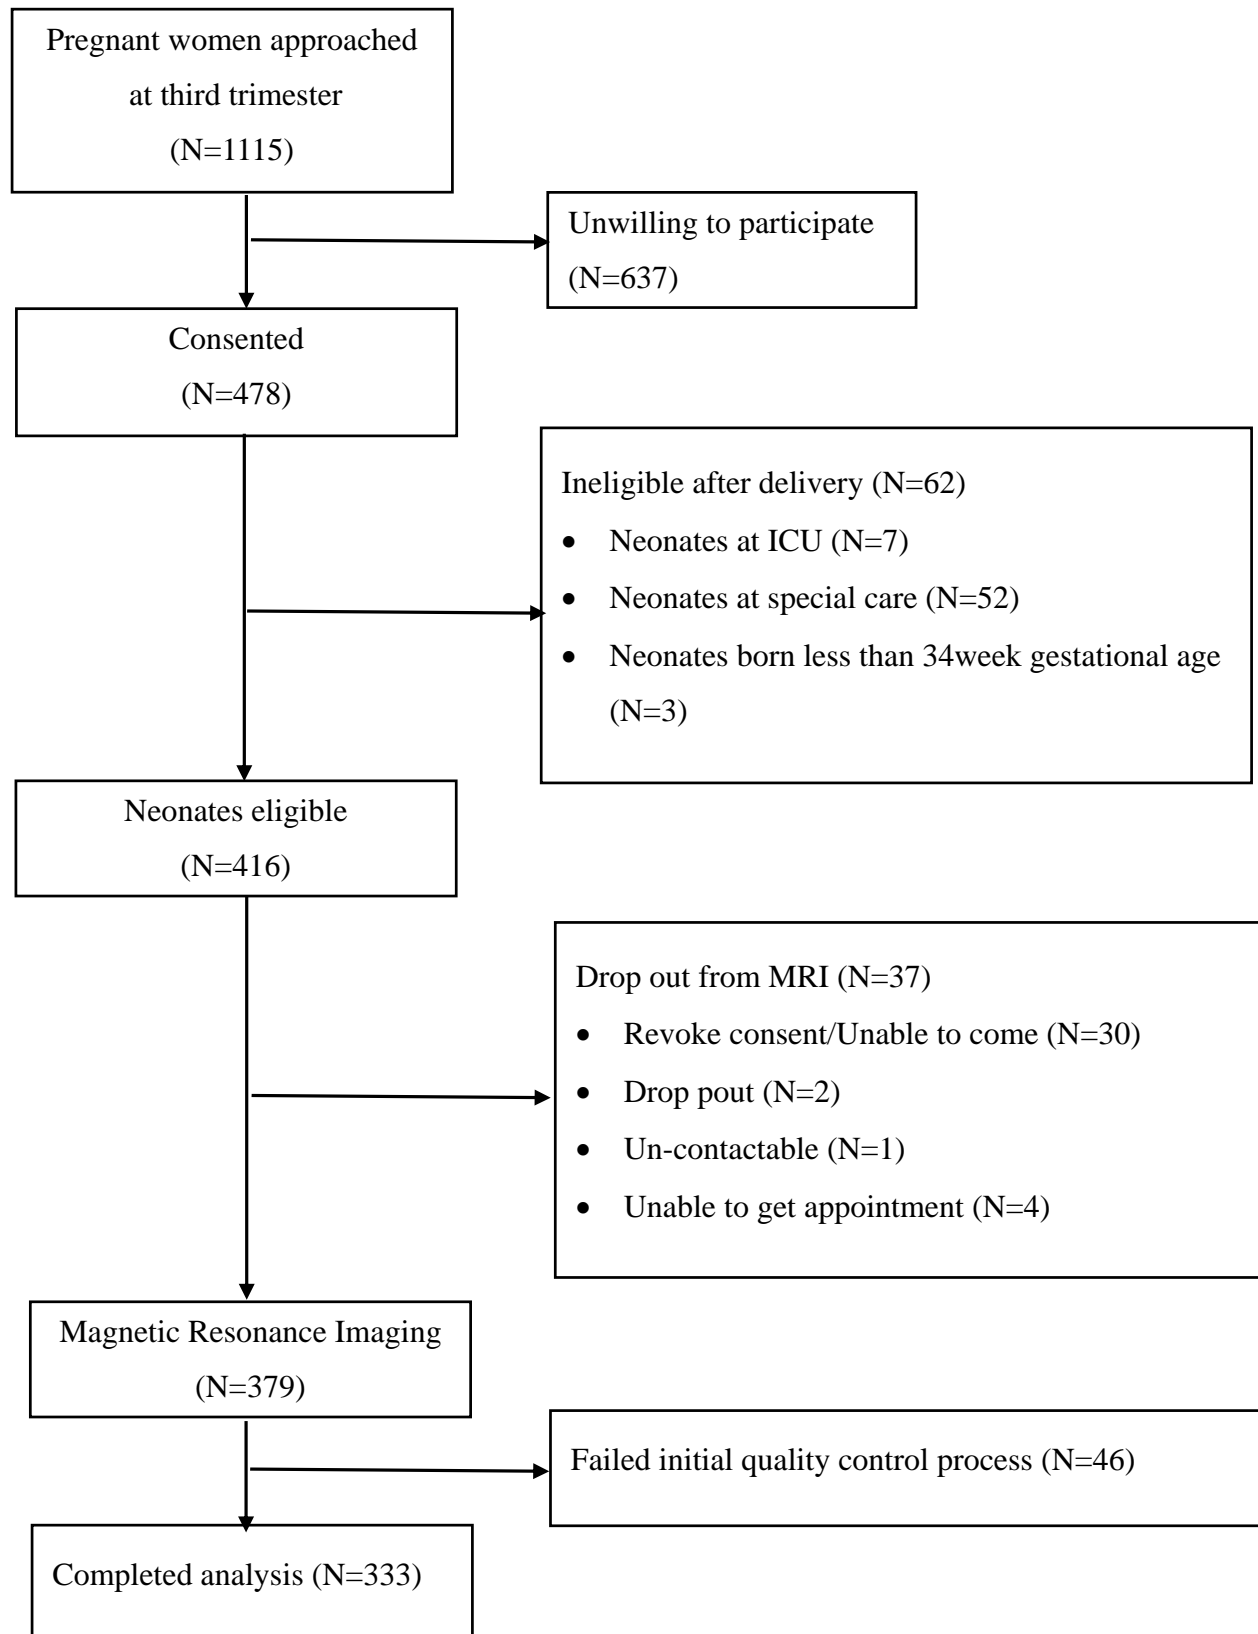

Supplement: NIHMS69027-supplement-Supplemental_Figure_1.pdf [file NIHMS69027-supplement-Supplemental_Figure_1.pdf]
